# Supplementary material
Source: Springer Nature journal article supplement (https://www.springermedizin.de/resource/supplementary/12877_2007_100_MOESM3_ESM.pdf/9441240)

**% of people who fell  
during follow-up (n=66)**

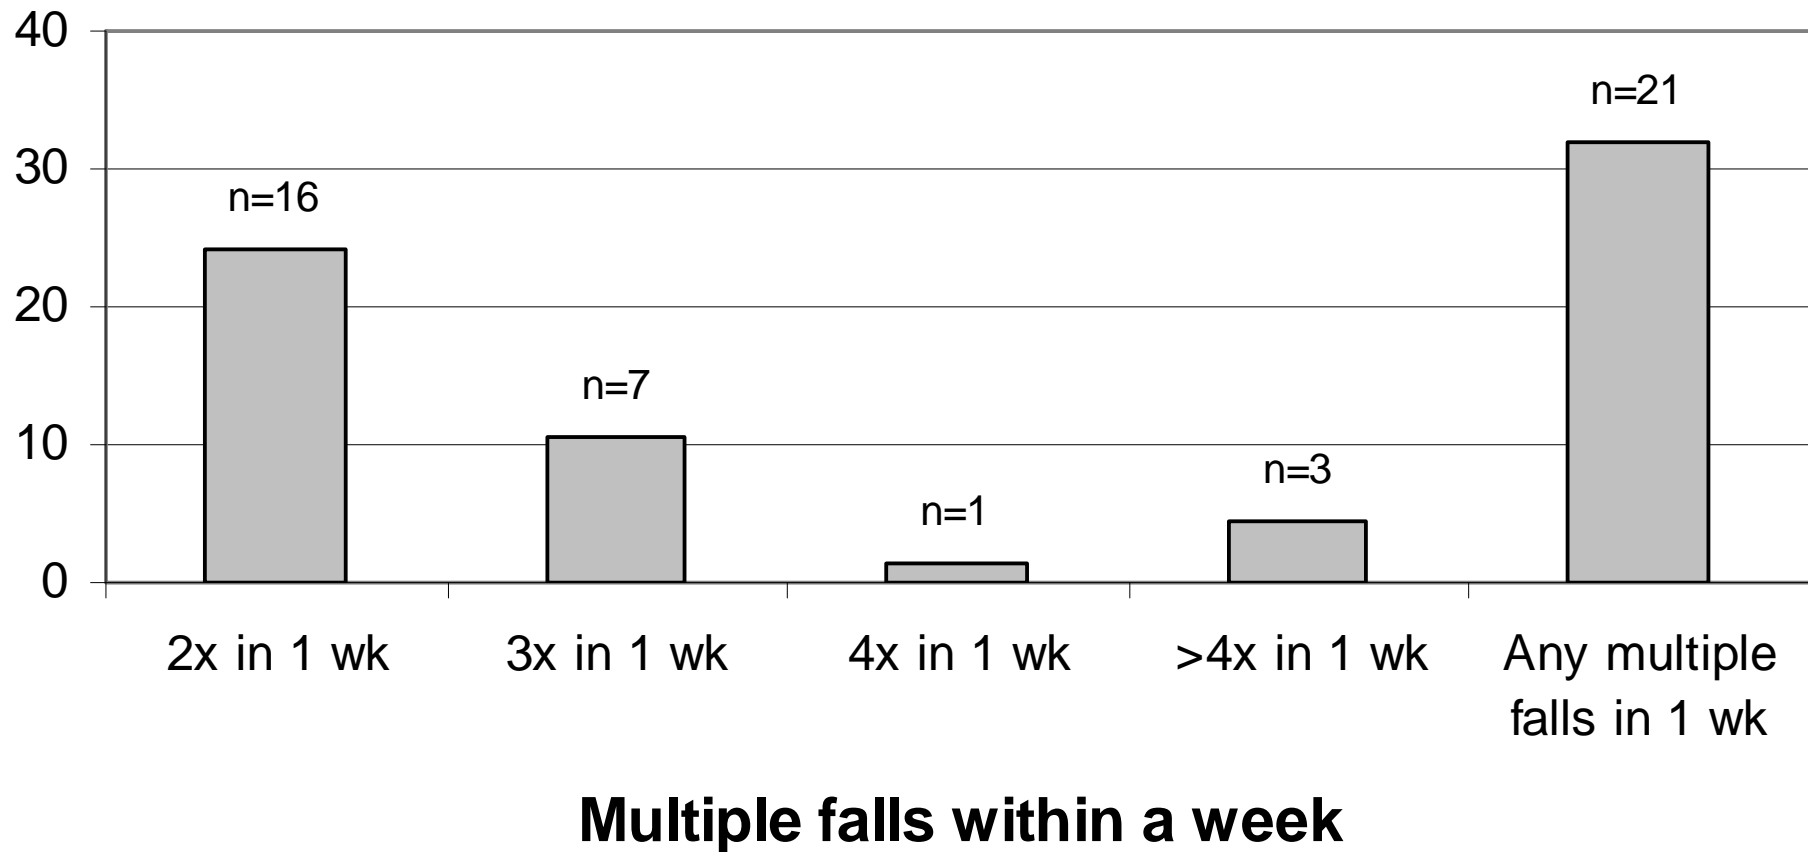

Supplement: MOESM3 [file 9441240]
